# Supplementary material for: Designed multifunctional ionic liquids–magnetic graphene nanocomposites as the adsorbent of MSPE for the determination of preservatives
Source: Royal Society of Chemistry journal article supplement (doi:10.1039/c7ay02746j), 2018-01-01
Supplement: c7ay02746j1.pdf [file c7ay02746j1.pdf]

*Electronic supplementary material for*

**Designed multifunctional ionic liquids-magnetic graphene  
nanocomposites as the adsorbent of MSPE for the determination of  
preservatives**

Shurui Cao<sup>a,\*</sup>, Yaling Chen<sup>b</sup>, Lei Zhang<sup>a</sup>, Cunxian Xi<sup>a</sup>, Xianliang Li<sup>a</sup>, Bobin Tang<sup>a</sup>,  
Guomin Wang<sup>a</sup>, Zhiqiong Chen<sup>b</sup>

<sup>a</sup>*The Inspection Technical Center of Chongqing Entry-Exit Inspection & Quarantine  
Bureau, Chongqing 400020, China*

<sup>b</sup>*College of Pharmacy, Chongqing Medical University, Chongqing 400016, China*

\* Corresponding author: Tel:13996301929

E-mail address: caoshurui@yeah.net

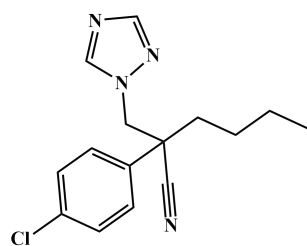

Myclobutanil

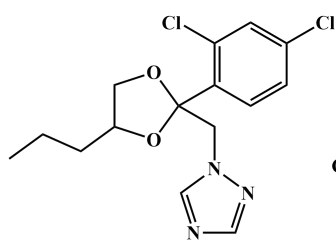

Propiconazole

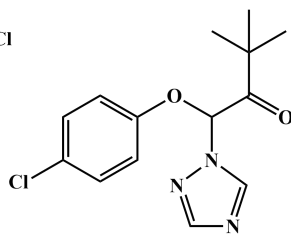

Triadimefon

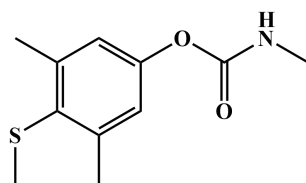

Mercaptodimethur

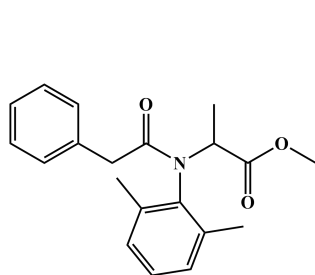

Benalaxyl

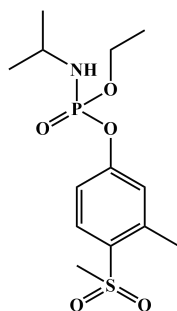

Fenamiphos

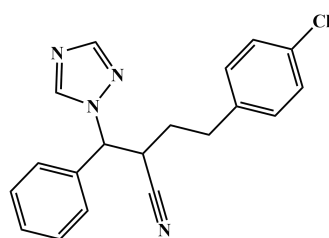

Fenbuconazole

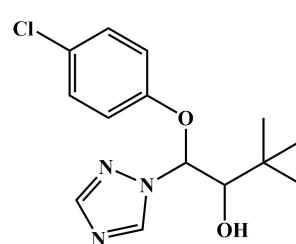

Triadimenol

**Fig. S1.** The chemical structures of 8 kinds of preservative compounds.
